# Supplementary material for: Photophysical properties and in vitro cytotoxicity studies of new Ru(ii) carbonyl complexes and mixed geometrical Ru(ii)–Ni(ii) complex in HS-DNA/BSA protein and human lung (A549) and liver (HepG2) cells
Source: Royal Society of Chemistry journal article supplement (doi:10.1039/c4ra08492f), 2014-10-06
Supplement: c4ra08492f1.pdf [file c4ra08492f1.pdf]

# Photophysical properties and *in vitro* cytotoxicity studies of new Ru(II) carbonyl complexes and mixed geometrical Ru(II)-Ni(II) complex in HS-DNA/BSA protein and human lung (A549) and liver (HepG2) cells

P. Kalaivani <sup>a,b</sup>, R. Prabhakaran <sup>a\*</sup>, F. Dallemer <sup>c</sup> and K. Natarajan

<sup>a</sup> Department of Chemistry, Bharathiar University, Coimbatore- 641 046, India

<sup>b</sup> Department of Chemistry, Nirmala College for Women, Coimbatore- 641 018, India

<sup>c</sup> Aix Marseille Universit\_e, CNRS, MADIREL UMR 7246, 13397, Marseille, France

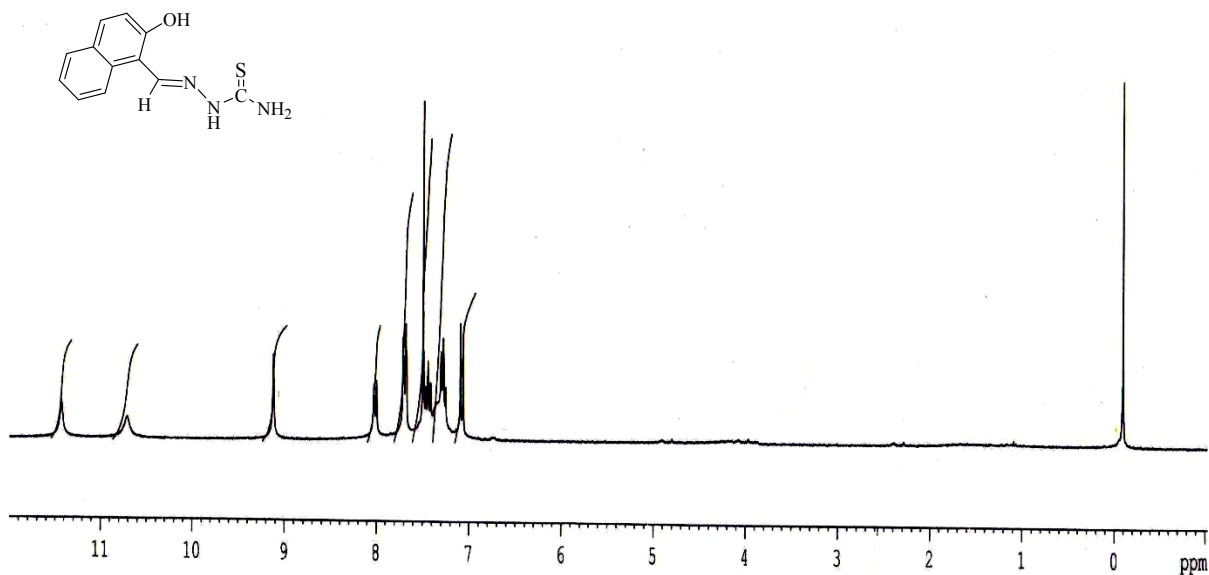

Fig. S1 <sup>1</sup>H-NMR spectrum of [H<sub>2</sub>-(Nap-tsc)]

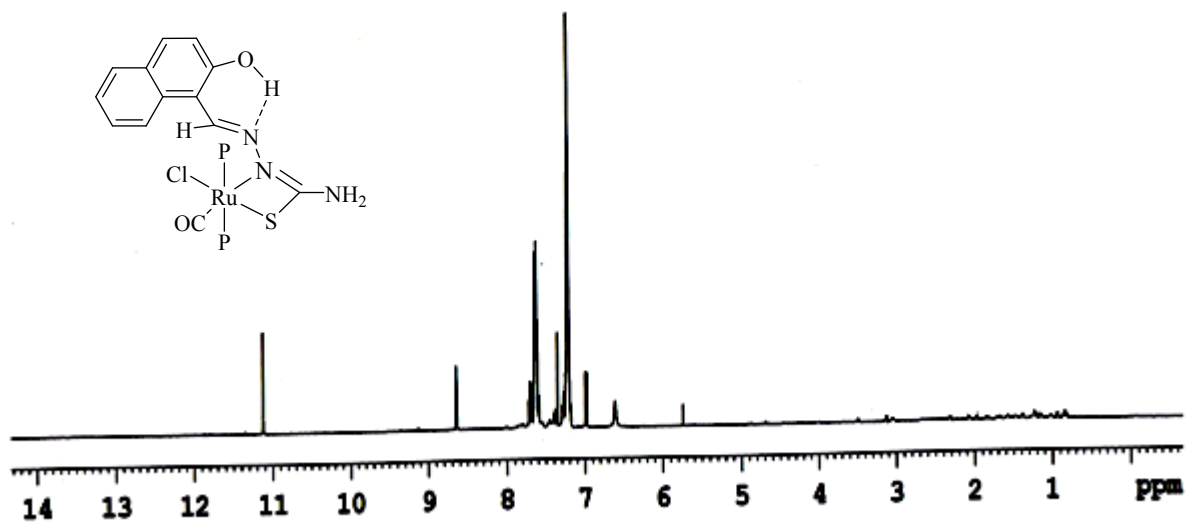

Fig. S2 <sup>1</sup>H-NMR spectrum of complex 1

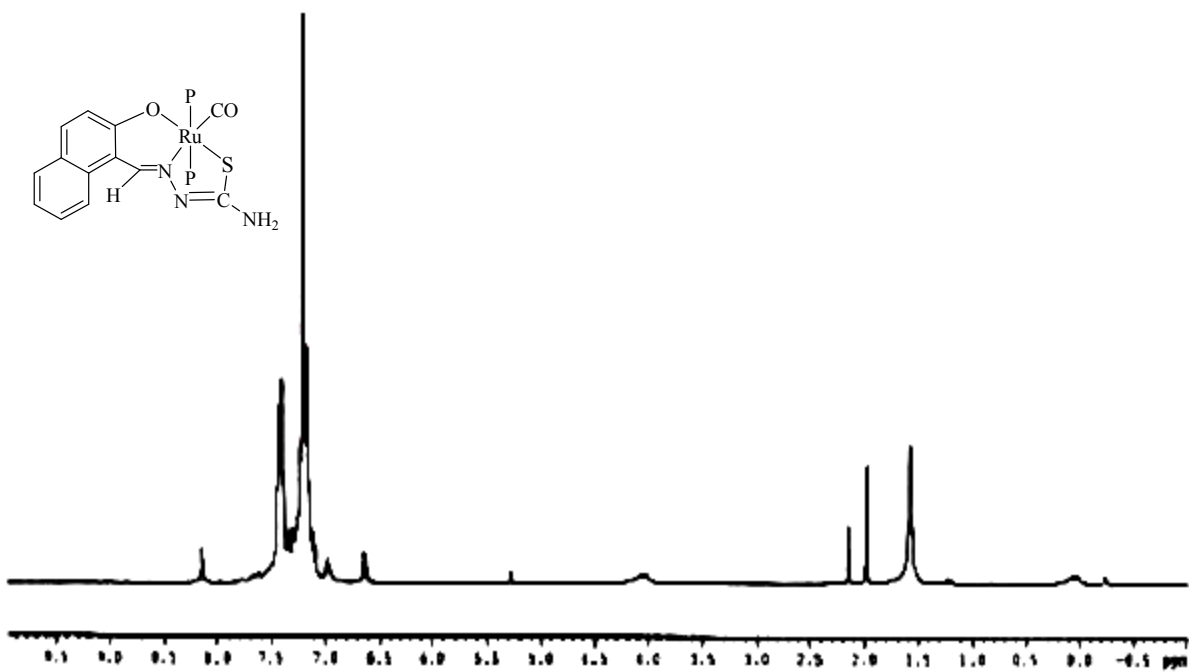

Fig. S3 <sup>1</sup>H-NMR spectrum of complex 2

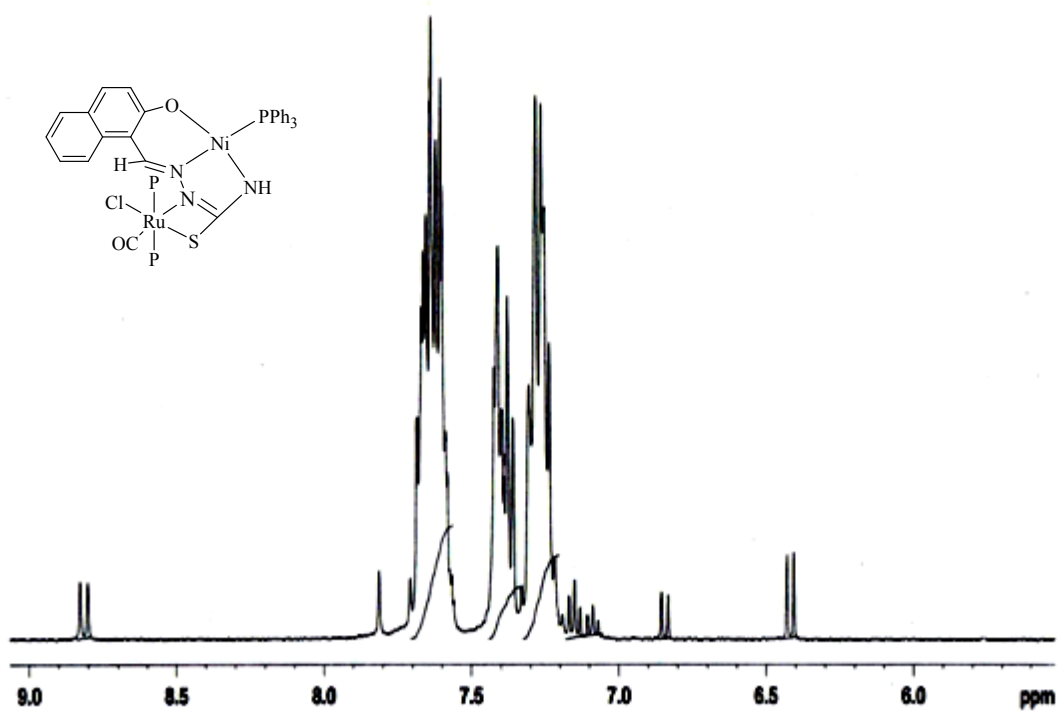

Fig. S4  $^1\text{H-NMR}$  spectrum of complex 3

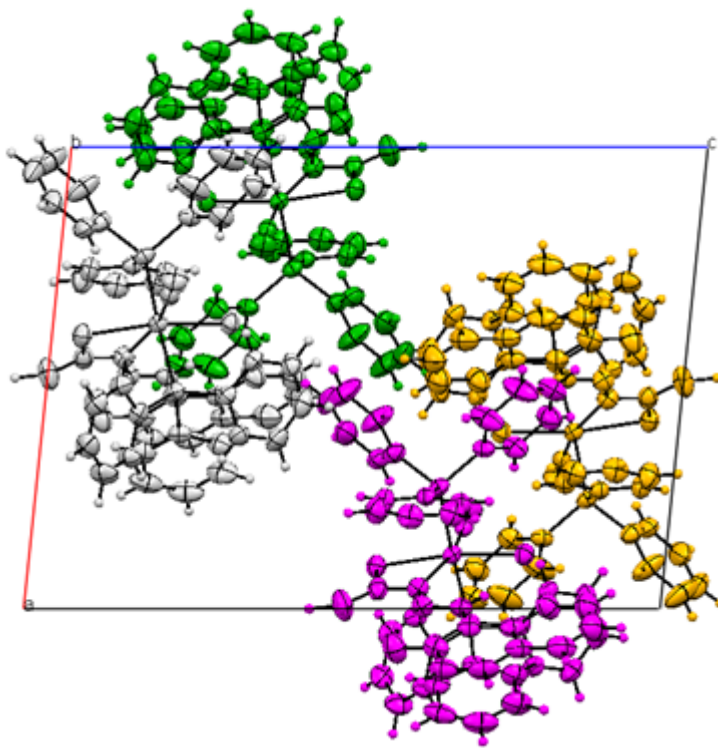

Fig. S5 Molecular packing diagram of 1a (view along the b axis)

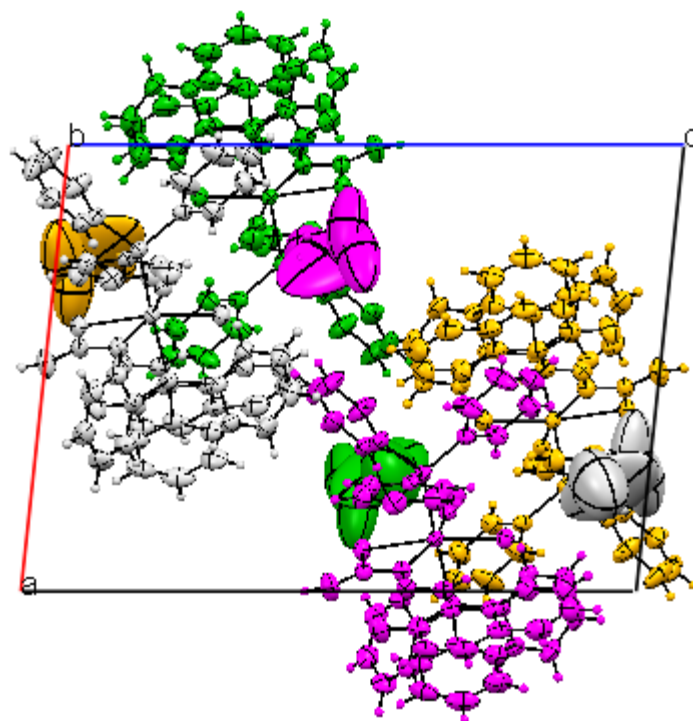

Fig. S6 Molecular packing diagram of 1b (view along the b axis)

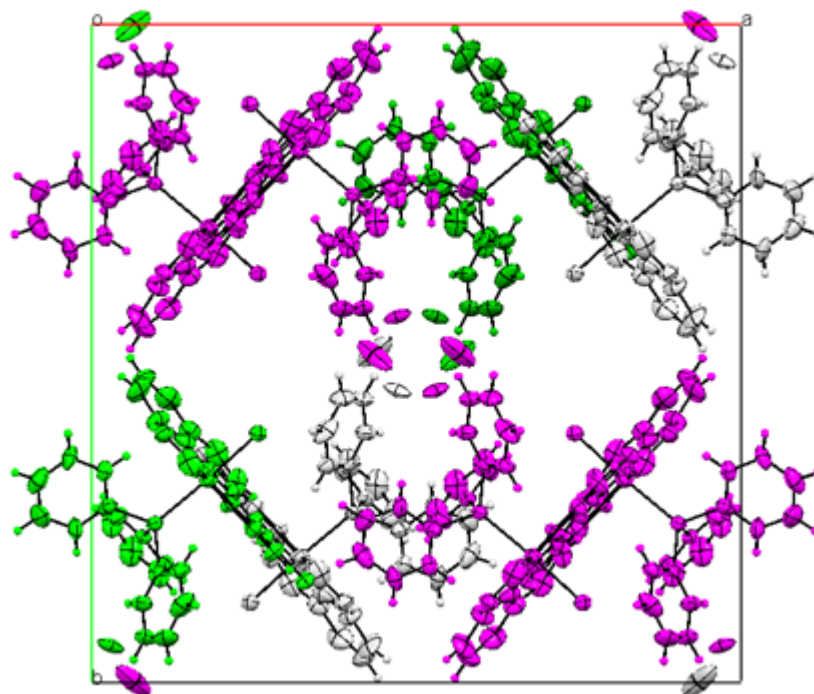

Fig. S7 molecular packing diagram of 3 (view along the c axis)

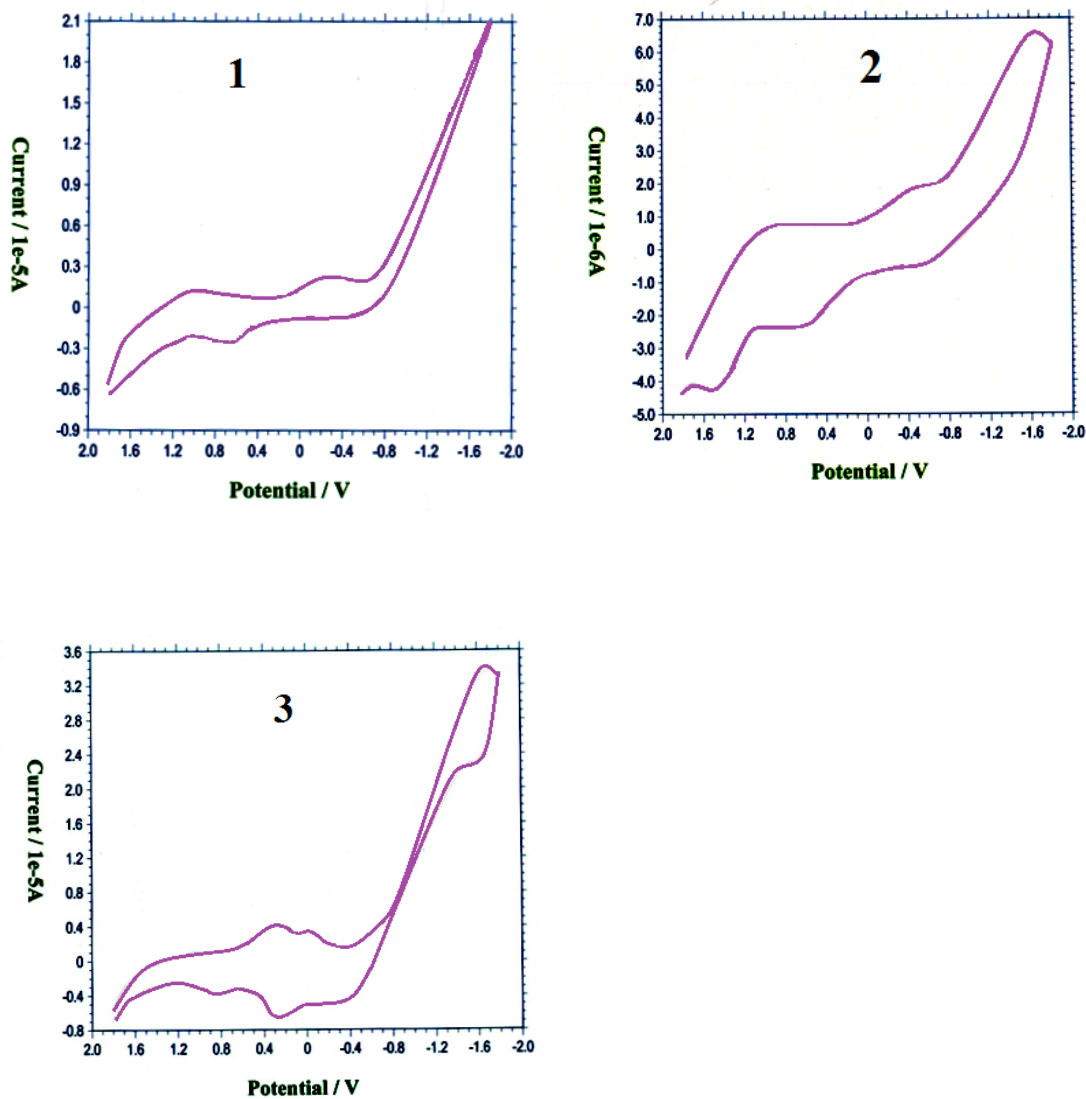

Figure S8. Cyclic voltammogram of the complexes 1-3

Table S1. Hydrogen bonds for 1a and 1b [ $\text{\AA}$  and  $^\circ$ ]

| D-H...A          | d(D-H) | d(H...A) | d(D...A) | $\angle$ (DHA) |
|------------------|--------|----------|----------|----------------|
| O(2)-H(2)...N(1) | 1.099  | 1.507    | 2.536    | 152.99         |
| O(2)-H(2)...N(1) | 0.957  | 1.657    | 2.546    | 152.85         |

Symmetry operation: (x, y, z)
